# Supplementary material for: Exogenous abscisic acid induces the lipid and flavonoid metabolism of tea plants under drought stress
Source: PubMed Central journal article supplement (PMC7378251; doi:10.1038/s41598-020-69080-1), 2020-07-23
Supplement: 41598_2020_69080_MOESM2_ESM.pdf [file 41598_2020_69080_MOESM2_ESM.pdf]

# **Exogenous abscisic acid induces the lipid and flavonoid metabolism of tea plants under drought stress**

Zhongshuai Gai<sup>1,2#</sup>, Yu Wang<sup>1#</sup>, Yiqian Ding<sup>1</sup>, Wenjun Qian<sup>1</sup>, Chen Qiu<sup>1</sup>, Hui Xie<sup>1</sup>, Litao Sun<sup>1</sup>, Zhongwu Jiang<sup>2</sup>, Qingping Ma<sup>3</sup>, Linjun Wang<sup>4</sup>, Zhaotang Ding<sup>1\*</sup>

<sup>1</sup>Tea Research Institute, Qingdao Agricultural University, Qingdao 266109, China

<sup>2</sup>College of Life Science, Yantai University, Yantai, Shandong, 264005, China

<sup>3</sup>College of agriculture, Liaocheng University, Liaocheng, Shandong, 252059, China

<sup>4</sup>Fruit tea station of weihai agricultural and rural affairs service center, Weihai, Shandong, 264200, China

# These authors contributed equally to this study.

**\*CORRESPONDENCE:**

Dr Zhaotang Ding

E-mails: dzttea@163.com

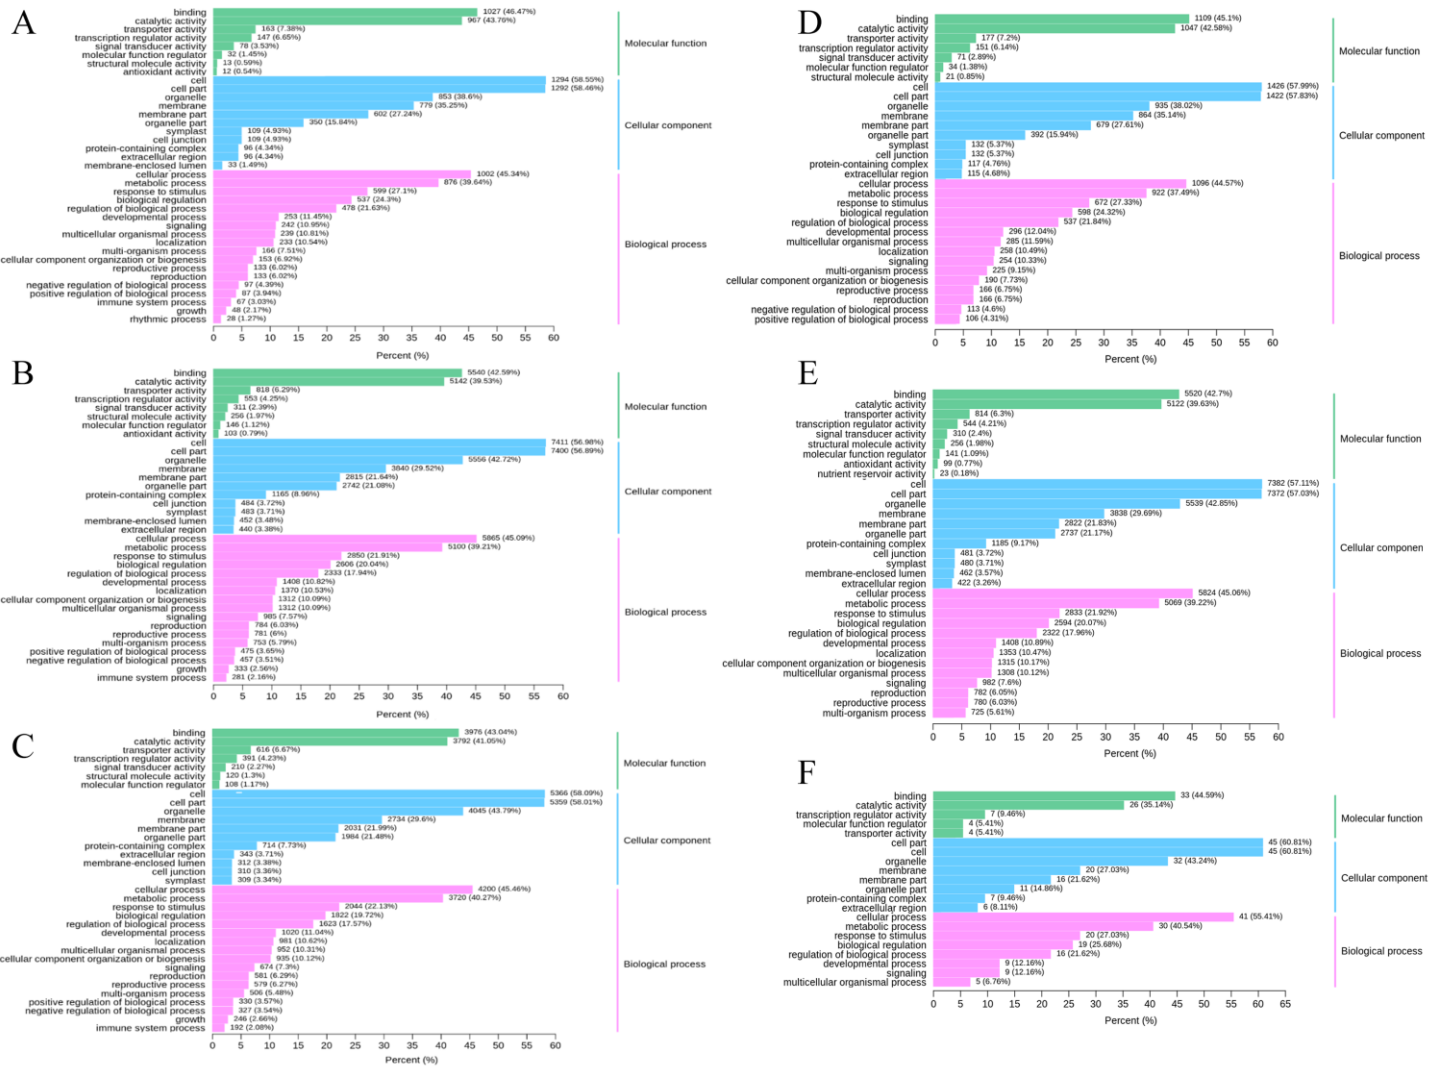

**Supplemental Figure S1.** GO enrichment analysis of DEGs. (A) GO enrichment analysis of DEGs in AT/MD. (B) GO enrichment analysis of DEGs in SD/MD. (C) GO enrichment analysis of DEGs in AT/SD. The figure was carried out using R software (version 3.2.4, USA).
