# Supplementary material for: Exogenous abscisic acid induces the lipid and flavonoid metabolism of tea plants under drought stress
Source: PubMed Central journal article supplement (PMC7378251; doi:10.1038/s41598-020-69080-1), 2020-07-23
Supplement: 41598_2020_69080_MOESM4_ESM.pdf [file 41598_2020_69080_MOESM4_ESM.pdf]

# Exogenous abscisic acid induces the lipid and flavonoid metabolism of tea plants under drought stress

Zhongshuai Gai<sup>12#</sup>, Yu Wang<sup>1#</sup>, Yiqian Ding<sup>1</sup>, Wenjun Qian<sup>1</sup>, Chen Qiu<sup>1</sup>, Hui Xie<sup>1</sup>, Litao Sun<sup>1</sup>, Zhongwu Jiang<sup>2</sup>, Qingping Ma<sup>3</sup>, Linjun Wang<sup>4</sup>, Zhaotang Ding<sup>1\*</sup>

<sup>1</sup>Tea Research Institute, Qingdao Agricultural University, Qingdao 266109, China

<sup>2</sup>College of Life Science, Yantai University, Yantai, Shandong, 264005, China

<sup>3</sup>College of agriculture, Liaocheng University, Liaocheng, Shandong, 252059, China

<sup>4</sup>Fruit tea station of weihai agricultural and rural affairs service center, Weihai, Shandong, 264200, China

# These authors contributed equally to this study.

\*CORRESPONDENCE: Dr Zhaotang Ding E-mails: dzttea@163.com

**Table S1 Quality of sequencing**

| Samples | Clean reads | Cleans bases |           |         | GC(%) |       |
|---------|-------------|--------------|-----------|---------|-------|-------|
|         |             | (G)          | Error (%) | Q20 (%) |       |       |
| CK1     | 53,324,234  | 8.0          | 0.34      | 97.29   | 92.97 | 44.52 |
| CK2     | 50,912,316  | 7.64         | 0.36      | 97.09   | 92.54 | 44.50 |
| CK3     | 49,215,718  | 7.38         | 0.33      | 97.37   | 93.22 | 44.70 |
| MD1     | 47,871,864  | 7.18         | 0.33      | 97.34   | 93.18 | 45.06 |
| MD2     | 53,180,726  | 7.98         | 0.32      | 97.48   | 93.44 | 44.80 |
| MD3     | 52,383,110  | 7.86         | 0.33      | 97.38   | 93.34 | 44.98 |
| AT1     | 51,863,816  | 7.78         | 0.33      | 97.35   | 93.29 | 45.14 |
| AT2     | 53,845,492  | 8.08         | 0.33      | 97.37   | 93.41 | 45.61 |
| AT3     | 52,340,128  | 7.85         | 0.32      | 97.48   | 93.66 | 45.66 |
| SD1     | 51,611,966  | 7.74         | 0.33      | 97.35   | 93.20 | 44.89 |
| SD2     | 51,740,376  | 7.76         | 0.33      | 97.40   | 93.36 | 45.01 |
| SD3     | 51,528,212  | 7.73         | 0.34      | 97.27   | 93.10 | 44.57 |

CK: control group; MD: mild drought group; AT: ABA treatment group; SD: severe drought group
