# Supplementary material for: Exogenous abscisic acid induces the lipid and flavonoid metabolism of tea plants under drought stress
Source: PubMed Central journal article supplement (PMC7378251; doi:10.1038/s41598-020-69080-1), 2020-07-23
Supplement: 41598_2020_69080_MOESM6_ESM.pdf [file 41598_2020_69080_MOESM6_ESM.pdf]

**Table S3** The fold changes of differential metabolites in lipid metabolism

| <b>Class</b>                | <b>Compounds</b>                                | <b>Log2FC<br/>(AT/MD)</b> | <b>Log2FC<br/>(SD/MD)</b> | <b>Log2FC<br/>(AT/SD)</b> |
|-----------------------------|-------------------------------------------------|---------------------------|---------------------------|---------------------------|
| <b>Glycerophospholipids</b> | LysoPC 16:1                                     | <b>1.37</b>               | <b>2.79</b>               | <b>-1.42</b>              |
|                             | PC 16:1/14:1                                    | <b>1.13</b>               | 0.94                      | 0.19                      |
|                             | LysoPC 18:2                                     | <b>1.39</b>               | <b>2.70</b>               | <b>-1.31</b>              |
|                             | LysoPC 18:3                                     | <b>1.76</b>               | <b>2.85</b>               | <b>-1.09</b>              |
|                             | LysoPC 16:0                                     | <b>2.13</b>               | <b>3.19</b>               | <b>-1.05</b>              |
|                             | LysoPE 14:0                                     | <b>2.07</b>               | <b>3.40</b>               | <b>-1.33</b>              |
|                             | LysoPC 14:0                                     | <b>1.68</b>               | <b>2.79</b>               | <b>-1.11</b>              |
|                             | LysoPE 18:2 (2n isomer)                         | <b>1.70</b>               | <b>3.30</b>               | <b>-1.60</b>              |
|                             | LysoPE 16:0                                     | <b>2.55</b>               | <b>4.01</b>               | <b>-1.46</b>              |
|                             | LysoPE 18:2                                     | <b>-1.50</b>              | <b>-1.23</b>              | -0.27                     |
|                             | LysoPC 18:1                                     | <b>1.28</b>               | <b>2.95</b>               | <b>-1.67</b>              |
|                             | LysoPE 18:0                                     | <b>2.25</b>               | <b>3.88</b>               | <b>-1.63</b>              |
|                             | LysoPC 15:1                                     | <b>1.40</b>               | <b>3.16</b>               | <b>-1.77</b>              |
|                             | LysoPC 15:0                                     | <b>1.84</b>               | <b>2.85</b>               | <b>-1.01</b>              |
|                             | LysoPC 17:0                                     | <b>2.41</b>               | <b>3.33</b>               | -0.93                     |
|                             | LysoPE 18:1                                     | <b>1.92</b>               | <b>3.68</b>               | <b>-1.76</b>              |
|                             | LysoPC 16:0 (2n isomer)                         | <b>1.91</b>               | <b>2.41</b>               | -0.50                     |
|                             | LysoPS 22:6                                     | <b>10.00</b>              | <b>11.57</b>              | <b>-1.56</b>              |
|                             | LysoPC 16:1 (2n isomer)                         | 0.63                      | <b>1.91</b>               | <b>-1.28</b>              |
|                             | LysoPC 18:1 (2n isomer)                         | 0.78                      | <b>1.94</b>               | <b>-1.16</b>              |
|                             | LysoPC 16:2 (2n isomer)                         | 0.98                      | <b>1.94</b>               | -0.95                     |
|                             | LysoPC 18:3 (2n isomer)                         | 0.49                      | <b>1.24</b>               | -0.75                     |
|                             | LysoPC 18:2 (2n isomer)                         | 0.60                      | <b>1.97</b>               | <b>-1.37</b>              |
|                             | LysoPC 18:0 (2n isomer)                         | 0.84                      | <b>2.10</b>               | <b>-1.26</b>              |
|                             | LysoPE 18:1 (2n isomer)                         | 0.11                      | <b>1.30</b>               | <b>-1.19</b>              |
|                             | LysoPC 20:4                                     | 0.43                      | <b>1.81</b>               | <b>-1.38</b>              |
| <b>Glycerolipids</b>        | MAG (18:4) isomer3                              | <b>1.20</b>               | <b>1.76</b>               | -0.55                     |
|                             | MAG (18:3) isomer3                              | <b>-1.28</b>              | -0.92                     | -0.36                     |
|                             | MAG (18:4) isomer1                              | 0.52                      | <b>1.09</b>               | -0.57                     |
|                             | MAG (18:1) isomer2                              | 0.07                      | <b>1.42</b>               | <b>-1.36</b>              |
|                             | MAG (18:3) isomer4                              | -0.62                     | <b>-1.12</b>              | 0.50                      |
|                             | MAG (18:1) isomer1                              | 0.14                      | <b>1.54</b>               | <b>-1.40</b>              |
|                             | DGMG (18:2) isomer1                             | -0.13                     | 0.96                      | <b>-1.10</b>              |
|                             | DGMG (18:2) isomer3                             | -0.19                     | 0.98                      | <b>-1.17</b>              |
| <b>Fatty acids</b>          | 13-HOTrE                                        | <b>1.03</b>               | 0.97                      | 0.06                      |
|                             | 13-HPODE                                        | <b>1.00</b>               | <b>1.26</b>               | -0.26                     |
|                             | "9-Hydroxy-(10E,12Z,15Z)-octadecatrienoic acid" | 0.91                      | <b>1.45</b>               | -0.54                     |
|                             | "4-oxo-9Z,11Z,13E,15E-octadecatetraenoic acid"  | 0.86                      | <b>1.34</b>               | -0.47                     |

Note: The FCs were described with the log<sub>2</sub> transformed numbers, the bold fonts indicate significant difference metabolites in AT/MD, SD/MD and AT/SD. The positive number indicates the increase and negative numbers indicates the decrease, MD: mild drought group; AT: ABA treatment group; SD: severe drought group.
