# Supplementary material for: Exogenous abscisic acid induces the lipid and flavonoid metabolism of tea plants under drought stress
Source: PubMed Central journal article supplement (PMC7378251; doi:10.1038/s41598-020-69080-1), 2020-07-23
Supplement: 41598_2020_69080_MOESM8_ESM.pdf [file 41598_2020_69080_MOESM8_ESM.pdf]

Exogenous abscisic acid induces the lipid and flavonoid metabolism of tea plants under drought stress  
Zhongshuai Gai 12#, Yu Wang1#, Yiqian Ding1, Wenjun Qian1, Chen Qiu1, Hui Xie1, Litao Sun1, Zhongwu Jiang2, Qingping Ma3, Linjun Wang4, Zhaotang Ding1\*

<sup>1</sup>Tea Research Institute, Qingdao Agricultural University, Qingdao 266109, China

<sup>2</sup>College of Life Science, Yantai University, Yantai, Shandong, 264005, China

<sup>3</sup>College of agriculture, Liaocheng University, Liaocheng, Shandong, 252059, China

<sup>4</sup>Fruit tea station of weihai agricultural and rural affairs service center, Weihai, Shandong, 264200, China

# These authors contributed equally to this study.

\*CORRESPONDENCE: Zhaotang Ding, E-mails: dzttea@163.com

| Gene ID   | KEGG                                                                                      |
|-----------|-------------------------------------------------------------------------------------------|
| CSA035088 | K08726: EPHX2; lipid-phosphate phosphatase [EC:3.3.2.10 3.1.3.76]                         |
| CSA031747 | K00901: DGK; diacylglycerol kinase (ATP) [EC:2.7.1.107]                                   |
| CSA004606 | K03715: MGD; 1,2-diacylglycerol 3-beta-galactosyltransferase [EC:2.4.1.46]                |
| CSA030599 | K00894: ETNK, EKI; ethanolamine kinase [EC:2.7.1.82]                                      |
| CSA014346 | K00432: gpx; glutathione peroxidase [EC:1.11.1.9]                                         |
| CSA011597 | K08726: EPHX2; lipid-phosphate phosphatase [EC:3.3.2.10 3.1.3.76]                         |
| CSA012072 | K00967: PCYT2; ethanolamine-phosphate cytidyltransferase [EC:2.7.7.14]                    |
| CSA034138 | K01094: GEP4; phosphatidylglycerophosphatase GEP4 [EC:3.1.3.27]                           |
| CSA033891 | K01115: PLD1_2; phospholipase D1/2 [EC:3.1.4.4]                                           |
| CSA016252 | K01126: glpQ, ugpQ; glycerophosphoryl diester phosphodiesterase [EC:3.1.4.46]             |
| CSA018764 | K01613: psd, PISD; phosphatidylserine decarboxylase [EC:4.1.1.65]                         |
| CSA001056 | K13510: LPCAT1_2; lysophosphatidylcholine acyltransferase [EC:2.3.1.23 2.3.1.67]          |
| CSA019962 | K15718: LOX1_5; linoleate 9S-lipoxygenase [EC:1.13.11.58]                                 |
| CSA005325 | K00232: ACOX1, ACOX3; acyl-CoA oxidase [EC:1.3.3.6]                                       |
| CSA012667 | K00454: LOX2S; lipoxygenase [EC:1.13.11.12]                                               |
| CSA016222 | K00454: LOX2S; lipoxygenase [EC:1.13.11.12]                                               |
| CSA000654 | K05894: OPR; 12-oxophytodienoic acid reductase [EC:1.3.1.42]                              |
| CSA001069 | K07513: ACAA1; acetyl-CoA acyltransferase 1 [EC:2.3.1.16]                                 |
| CSA013647 | K10526: OPCL1; OPC-8:0 CoA ligase 1 [EC:6.2.1.-]                                          |
| CSA000775 | K18857: ADH1; alcohol dehydrogenase class-P [EC:1.1.1.1]                                  |
| CSA005266 | K00002: AKR1A1, adh; alcohol dehydrogenase (NADP+) [EC:1.1.1.2]                           |
| CSA005242 | K00128: ALDH; aldehyde dehydrogenase (NAD+) [EC:1.2.1.3]                                  |
| CSA031091 | K00901: DGK; diacylglycerol kinase (ATP) [EC:2.7.1.107]                                   |
| CSA032782 | K13519: LPT1, ALE1; lysophospholipid acyltransferase [EC:2.3.1.51 2.3.1.23 2.3.1.-]       |
| CSA025168 | K14457: MOGAT2, MGAT2; 2-acylglycerol O-acyltransferase 2 [EC:2.3.1.22]                   |
| CSA025169 | K14457: MOGAT2, MGAT2; 2-acylglycerol O-acyltransferase 2 [EC:2.3.1.22]                   |
| CSA016717 | K01074: PPT; palmitoyl-protein thioesterase [EC:3.1.2.22]                                 |
| CSA028920 | K01897: ACSL, fadD; long-chain acyl-CoA synthetase [EC:6.2.1.3]                           |
| CSA026812 | K03921: FAB2, acyl-[acyl-carrier-protein] desaturase [EC:1.14.19.2 1.14.19.11 1.14.19.26] |
| CSA000990 | K10781: FATB; fatty acyl-ACP thioesterase B [EC:3.1.2.14 3.1.2.21]                        |
| CSA021792 | K00121: ADH5, alcohol dehydrogenase [EC:1.1.1.284 1.1.1.1]                                |
| CSA005321 | K00232: ACOX1, ACOX3; acyl-CoA oxidase [EC:1.3.3.6]                                       |
| CSA013107 | K10781: FATB; fatty acyl-ACP thioesterase B [EC:3.1.2.14 3.1.2.21]                        |
| CSA035327 | K07513: ACAA1; acetyl-CoA acyltransferase 1 [EC:2.3.1.16]                                 |
| CSA034864 | K01115: PLD1_2; phospholipase D1/2 [EC:3.1.4.4]                                           |
| CSA001052 | K13510: LPCAT1_2; lysophosphatidylcholine acyltransferase [EC:2.3.1.23 2.3.1.67]          |
| CSA011293 | K09480: DGD; digalactosyldiacylglycerol synthase [EC:2.4.1.241]                           |
| CSA015544 | K10525: AOC; allene oxide cyclase [EC:5.3.99.6]                                           |
| CSA019328 | K05309: PTGES2; microsomal prostaglandin-E synthase 2 [EC:5.3.99.3]                       |
| CSA003686 | K01115: PLD1_2; phospholipase D1/2 [EC:3.1.4.4]                                           |
| CSA005815 | K01115: PLD1_2; phospholipase D1/2 [EC:3.1.4.4]                                           |
| CSA002136 | K08730: PTDSS2; phosphatidylserine synthase 2 [EC:2.7.8.29]                               |
| CSA005774 | K05894: OPR; 12-oxophytodienoic acid reductase [EC:1.3.1.42]                              |
| CSA017230 | K00655: plsC; 1-acyl-sn-glycerol-3-phosphate acyltransferase [EC:2.3.1.51]                |
| CSA030062 | K01054: MGLL; acylglycerol lipase [EC:3.1.1.23]                                           |
| CSA021790 | K00121:ADH5,alcohol dehydrogenase [EC:1.1.1.284 1.1.1.1]                                  |
| CSA029366 | K05894: OPR; 12-oxophytodienoic acid reductase [EC:1.3.1.42]                              |
| CSA024872 | K01114: plc; phospholipase C [EC:3.1.4.3]                                                 |
| CSA008570 | K01115: PLD1_2; phospholipase D1/2 [EC:3.1.4.4]                                           |
| CSA012038 | K00128: ALDH; aldehyde dehydrogenase (NAD+) [EC:1.2.1.3]                                  |
| CSA018033 | K00679: phospholipid:diacylglycerol acyltransferase [EC:2.3.1.158]                        |
| CSA005692 | K14156: CHK; choline/ethanolamine kinase [EC:2.7.1.32 2.7.1.82]                           |
| CSA012669 | K00454: LOX2S; lipoxygenase [EC:1.13.11.12]                                               |
| CSA006062 | K10526: OPCL1; OPC-8:0 CoA ligase 1 [EC:6.2.1.-]                                          |
| CSA006715 | K18696: GDE1; glycerophosphodiester phosphodiesterase [EC:3.1.4.46]                       |
| CSA024081 | K00981: CDS1, CDS2, ; phosphatidate cytidyltransferase [EC:2.7.7.41]                      |

| <b>Index</b> | <b>Compounds</b>                                |
|--------------|-------------------------------------------------|
| pmb0165      | LysoPC 16:1                                     |
| pmb0852      | LysoPC 18:2                                     |
| pmb0854      | LysoPC 18:3                                     |
| pmb0855      | LysoPC 16:0                                     |
| pmb0864      | LysoPE 14:0                                     |
| pmb0866      | LysoPC 14:0                                     |
| pmb0874      | LysoPE 18:2 (2n isomer)                         |
| pmb0876      | LysoPE 16:0                                     |
| pmb0882      | LysoPC 18:1                                     |
| pmb0883      | LysoPE 18:0                                     |
| pmb1562      | MAG (18:4) isomer3                              |
| pmb2260      | LysoPC 15:1                                     |
| pmb2319      | LysoPC 15:0                                     |
| pmb2406      | LysoPC 17:0                                     |
| pmb2804      | 13-HPODE                                        |
| pmb3121      | LysoPE 18:1                                     |
| pmd0132      | LysoPC 16:0 (2n isomer)                         |
| pmd0151      | LysoPS 22:6                                     |
| pma3606      | "9-Hydroxy-(10E,12Z,15Z)-octadecatrienoic acid" |
| pmb0149      | MAG (18:4) isomer1                              |
| pmb0296      | MAG (18:1) isomer2                              |
| pmb0848      | LysoPC 16:1 (2n isomer)                         |
| pmb0859      | LysoPC 18:1 (2n isomer)                         |
| pmb0863      | LysoPC 16:2 (2n isomer)                         |
| pmb0865      | LysoPC 18:3 (2n isomer)                         |
| pmb0873      | LysoPC 18:2 (2n isomer)                         |
| pmb0885      | "4-oxo-9Z,11Z,13E,15E-octadecatetraenoic acid"  |
| pmb1656      | MAG (18:3) isomer4                              |
| pmb2363      | MAG (18:1) isomer1                              |
| pmb2388      | LysoPC 18:0 (2n isomer)                         |
| pmb3132      | LysoPE 18:1 (2n isomer)                         |
| pmc0960      | LysoPC 20:4                                     |
| pmb0161      | DGMG (18:2) isomer1                             |
| pmb0163      | DGMG (18:2) isomer3                             |

| <b>geneName</b> | <b>metaName</b> | <b>R<sup>2</sup></b> |
|-----------------|-----------------|----------------------|
| CSA035088       | pmb0165         | 0.899                |
| CSA000654       | pmb0852         | -0.803               |
| CSA000990       | pmb0852         | 0.94                 |
| CSA001056       | pmb0852         | -0.843               |
| CSA001069       | pmb0852         | 0.86                 |
| CSA004606       | pmb0852         | -0.831               |
| CSA005242       | pmb0852         | -0.894               |
| CSA005266       | pmb0852         | 0.846                |
| CSA005325       | pmb0852         | 0.818                |
| CSA012072       | pmb0852         | 0.89                 |
| CSA012667       | pmb0852         | -0.824               |
| CSA013647       | pmb0852         | -0.841               |
| CSA014346       | pmb0852         | 0.914                |
| CSA016222       | pmb0852         | -0.836               |
| CSA016717       | pmb0852         | -0.801               |
| CSA018764       | pmb0852         | -0.834               |
| CSA019962       | pmb0852         | -0.806               |
| CSA021792       | pmb0852         | -0.831               |
| CSA025168       | pmb0852         | -0.907               |
| CSA025169       | pmb0852         | -0.88                |
| CSA026812       | pmb0852         | 0.9                  |
| CSA028920       | pmb0852         | -0.842               |
| CSA030599       | pmb0852         | 0.939                |
| CSA031091       | pmb0852         | 0.921                |
| CSA032782       | pmb0852         | 0.89                 |
| CSA033891       | pmb0852         | 0.811                |
| CSA034138       | pmb0852         | -0.808               |
| CSA000990       | pmb0854         | 0.945                |
| CSA001056       | pmb0854         | -0.835               |
| CSA001069       | pmb0854         | 0.867                |
| CSA004606       | pmb0854         | -0.829               |
| CSA005242       | pmb0854         | -0.865               |
| CSA005266       | pmb0854         | 0.836                |
| CSA005321       | pmb0854         | 0.802                |

|           |         |        |
|-----------|---------|--------|
| CSA005325 | pmb0854 | 0.818  |
| CSA012072 | pmb0854 | 0.856  |
| CSA012667 | pmb0854 | -0.803 |
| CSA013107 | pmb0854 | 0.833  |
| CSA013647 | pmb0854 | -0.817 |
| CSA014346 | pmb0854 | 0.913  |
| CSA018764 | pmb0854 | -0.831 |
| CSA021792 | pmb0854 | -0.802 |
| CSA025168 | pmb0854 | -0.879 |
| CSA025169 | pmb0854 | -0.857 |
| CSA026812 | pmb0854 | 0.881  |
| CSA028920 | pmb0854 | -0.819 |
| CSA030599 | pmb0854 | 0.967  |
| CSA031091 | pmb0854 | 0.934  |
| CSA032782 | pmb0854 | 0.879  |
| CSA000990 | pmb0855 | 0.947  |
| CSA001056 | pmb0855 | -0.831 |
| CSA001069 | pmb0855 | 0.873  |
| CSA004606 | pmb0855 | -0.82  |
| CSA005242 | pmb0855 | -0.851 |
| CSA005266 | pmb0855 | 0.824  |
| CSA005325 | pmb0855 | 0.809  |
| CSA012072 | pmb0855 | 0.813  |
| CSA013107 | pmb0855 | 0.854  |
| CSA014346 | pmb0855 | 0.914  |
| CSA018764 | pmb0855 | -0.821 |
| CSA025168 | pmb0855 | -0.869 |
| CSA025169 | pmb0855 | -0.849 |
| CSA026812 | pmb0855 | 0.853  |
| CSA030599 | pmb0855 | 0.966  |
| CSA031091 | pmb0855 | 0.913  |
| CSA032782 | pmb0855 | 0.859  |
| CSA000990 | pmb0864 | 0.938  |
| CSA001056 | pmb0864 | -0.814 |
| CSA001069 | pmb0864 | 0.858  |
| CSA004606 | pmb0864 | -0.806 |
| CSA005242 | pmb0864 | -0.852 |
| CSA005266 | pmb0864 | 0.816  |
| CSA012072 | pmb0864 | 0.839  |
| CSA013107 | pmb0864 | 0.806  |
| CSA014346 | pmb0864 | 0.903  |
| CSA018764 | pmb0864 | -0.81  |
| CSA025168 | pmb0864 | -0.876 |
| CSA025169 | pmb0864 | -0.851 |
| CSA026812 | pmb0864 | 0.876  |
| CSA030599 | pmb0864 | 0.947  |
| CSA031091 | pmb0864 | 0.909  |
| CSA032782 | pmb0864 | 0.862  |
| CSA000990 | pmb0866 | 0.941  |
| CSA001056 | pmb0866 | -0.824 |
| CSA001069 | pmb0866 | 0.879  |
| CSA004606 | pmb0866 | -0.812 |
| CSA005242 | pmb0866 | -0.868 |
| CSA005266 | pmb0866 | 0.816  |
| CSA005321 | pmb0866 | 0.815  |
| CSA005325 | pmb0866 | 0.814  |
| CSA012072 | pmb0866 | 0.849  |
| CSA012667 | pmb0866 | -0.803 |
| CSA013107 | pmb0866 | 0.824  |
| CSA013647 | pmb0866 | -0.807 |
| CSA014346 | pmb0866 | 0.911  |
| CSA016222 | pmb0866 | -0.805 |
| CSA018764 | pmb0866 | -0.81  |
| CSA021792 | pmb0866 | -0.807 |
| CSA025168 | pmb0866 | -0.893 |
| CSA025169 | pmb0866 | -0.86  |
| CSA026812 | pmb0866 | 0.866  |
| CSA028920 | pmb0866 | -0.812 |
| CSA030599 | pmb0866 | 0.955  |
| CSA031091 | pmb0866 | 0.909  |
| CSA032782 | pmb0866 | 0.865  |

|           |         |        |
|-----------|---------|--------|
| CSA000654 | pmb0874 | -0.81  |
| CSA000990 | pmb0874 | 0.944  |
| CSA001052 | pmb0874 | -0.809 |
| CSA001056 | pmb0874 | -0.852 |
| CSA001069 | pmb0874 | 0.859  |
| CSA004606 | pmb0874 | -0.845 |
| CSA005242 | pmb0874 | -0.893 |
| CSA005266 | pmb0874 | 0.87   |
| CSA005321 | pmb0874 | 0.828  |
| CSA005325 | pmb0874 | 0.847  |
| CSA011293 | pmb0874 | 0.825  |
| CSA012072 | pmb0874 | 0.911  |
| CSA012667 | pmb0874 | -0.836 |
| CSA013107 | pmb0874 | 0.822  |
| CSA013647 | pmb0874 | -0.856 |
| CSA014346 | pmb0874 | 0.922  |
| CSA016222 | pmb0874 | -0.838 |
| CSA016717 | pmb0874 | -0.806 |
| CSA018764 | pmb0874 | -0.847 |
| CSA019962 | pmb0874 | -0.815 |
| CSA021792 | pmb0874 | -0.846 |
| CSA025168 | pmb0874 | -0.894 |
| CSA025169 | pmb0874 | -0.875 |
| CSA026812 | pmb0874 | 0.913  |
| CSA028920 | pmb0874 | -0.857 |
| CSA030599 | pmb0874 | 0.96   |
| CSA031091 | pmb0874 | 0.954  |
| CSA032782 | pmb0874 | 0.916  |
| CSA033891 | pmb0874 | 0.855  |
| CSA034138 | pmb0874 | -0.817 |
| CSA034864 | pmb0874 | 0.821  |
| CSA000990 | pmb0876 | 0.949  |
| CSA001056 | pmb0876 | -0.828 |
| CSA001069 | pmb0876 | 0.85   |
| CSA004606 | pmb0876 | -0.818 |
| CSA005242 | pmb0876 | -0.851 |
| CSA005266 | pmb0876 | 0.842  |
| CSA005325 | pmb0876 | 0.806  |
| CSA012072 | pmb0876 | 0.821  |
| CSA013107 | pmb0876 | 0.86   |
| CSA013647 | pmb0876 | -0.803 |
| CSA014346 | pmb0876 | 0.904  |
| CSA018764 | pmb0876 | -0.825 |
| CSA025168 | pmb0876 | -0.871 |
| CSA025169 | pmb0876 | -0.853 |
| CSA026812 | pmb0876 | 0.865  |
| CSA028920 | pmb0876 | -0.802 |
| CSA030599 | pmb0876 | 0.961  |
| CSA031091 | pmb0876 | 0.922  |
| CSA032782 | pmb0876 | 0.868  |
| CSA000654 | pmb0882 | -0.869 |
| CSA000990 | pmb0882 | 0.954  |
| CSA001052 | pmb0882 | -0.808 |
| CSA001056 | pmb0882 | -0.874 |
| CSA001069 | pmb0882 | 0.941  |
| CSA002136 | pmb0882 | -0.848 |
| CSA004606 | pmb0882 | -0.844 |
| CSA005242 | pmb0882 | -0.944 |
| CSA005266 | pmb0882 | 0.859  |
| CSA005321 | pmb0882 | 0.869  |
| CSA005325 | pmb0882 | 0.896  |
| CSA005774 | pmb0882 | -0.826 |
| CSA011293 | pmb0882 | 0.829  |
| CSA012072 | pmb0882 | 0.876  |
| CSA012667 | pmb0882 | -0.875 |
| CSA013647 | pmb0882 | -0.867 |
| CSA014346 | pmb0882 | 0.917  |
| CSA016222 | pmb0882 | -0.888 |
| CSA016717 | pmb0882 | -0.836 |
| CSA017230 | pmb0882 | -0.861 |
| CSA018764 | pmb0882 | -0.841 |

|           |         |        |
|-----------|---------|--------|
| CSA019328 | pmb0882 | 0.833  |
| CSA019962 | pmb0882 | -0.828 |
| CSA021790 | pmb0882 | -0.84  |
| CSA021792 | pmb0882 | -0.883 |
| CSA025168 | pmb0882 | -0.923 |
| CSA025169 | pmb0882 | -0.896 |
| CSA026812 | pmb0882 | 0.932  |
| CSA028920 | pmb0882 | -0.882 |
| CSA030062 | pmb0882 | 0.814  |
| CSA030599 | pmb0882 | 0.915  |
| CSA031091 | pmb0882 | 0.907  |
| CSA032782 | pmb0882 | 0.926  |
| CSA033891 | pmb0882 | 0.821  |
| CSA034138 | pmb0882 | -0.876 |
| CSA034864 | pmb0882 | 0.84   |
| CSA000990 | pmb0883 | 0.961  |
| CSA001052 | pmb0883 | -0.807 |
| CSA001056 | pmb0883 | -0.856 |
| CSA001069 | pmb0883 | 0.859  |
| CSA004606 | pmb0883 | -0.846 |
| CSA005242 | pmb0883 | -0.87  |
| CSA005266 | pmb0883 | 0.838  |
| CSA012072 | pmb0883 | 0.806  |
| CSA012667 | pmb0883 | -0.81  |
| CSA013107 | pmb0883 | 0.833  |
| CSA013647 | pmb0883 | -0.821 |
| CSA014346 | pmb0883 | 0.897  |
| CSA018764 | pmb0883 | -0.848 |
| CSA021792 | pmb0883 | -0.802 |
| CSA025168 | pmb0883 | -0.89  |
| CSA025169 | pmb0883 | -0.867 |
| CSA026812 | pmb0883 | 0.864  |
| CSA028920 | pmb0883 | -0.822 |
| CSA030599 | pmb0883 | 0.942  |
| CSA031091 | pmb0883 | 0.911  |
| CSA032782 | pmb0883 | 0.859  |
| CSA000990 | pmb1562 | 0.879  |
| CSA001056 | pmb1562 | -0.803 |
| CSA001069 | pmb1562 | 0.827  |
| CSA004606 | pmb1562 | -0.808 |
| CSA014346 | pmb1562 | 0.849  |
| CSA018764 | pmb1562 | -0.808 |
| CSA026812 | pmb1562 | 0.845  |
| CSA030599 | pmb1562 | 0.886  |
| CSA031091 | pmb1562 | 0.88   |
| CSA032782 | pmb1562 | 0.806  |
| CSA000654 | pmb2260 | -0.819 |
| CSA000990 | pmb2260 | 0.931  |
| CSA001052 | pmb2260 | -0.813 |
| CSA001056 | pmb2260 | -0.86  |
| CSA001069 | pmb2260 | 0.835  |
| CSA004606 | pmb2260 | -0.838 |
| CSA005242 | pmb2260 | -0.894 |
| CSA005266 | pmb2260 | 0.899  |
| CSA005321 | pmb2260 | 0.861  |
| CSA005325 | pmb2260 | 0.885  |
| CSA011293 | pmb2260 | 0.824  |
| CSA012072 | pmb2260 | 0.89   |
| CSA012667 | pmb2260 | -0.853 |
| CSA013107 | pmb2260 | 0.856  |
| CSA013647 | pmb2260 | -0.853 |
| CSA014346 | pmb2260 | 0.888  |
| CSA016222 | pmb2260 | -0.838 |
| CSA016717 | pmb2260 | -0.818 |
| CSA018764 | pmb2260 | -0.841 |
| CSA021790 | pmb2260 | -0.81  |
| CSA021792 | pmb2260 | -0.872 |
| CSA025168 | pmb2260 | -0.906 |
| CSA025169 | pmb2260 | -0.891 |
| CSA026812 | pmb2260 | 0.896  |
| CSA028920 | pmb2260 | -0.863 |

|           |         |        |
|-----------|---------|--------|
| CSA030599 | pmb2260 | 0.943  |
| CSA031091 | pmb2260 | 0.955  |
| CSA032782 | pmb2260 | 0.912  |
| CSA033891 | pmb2260 | 0.867  |
| CSA034138 | pmb2260 | -0.842 |
| CSA034864 | pmb2260 | 0.843  |
| CSA000990 | pmb2319 | 0.94   |
| CSA001056 | pmb2319 | -0.817 |
| CSA001069 | pmb2319 | 0.854  |
| CSA004606 | pmb2319 | -0.803 |
| CSA005242 | pmb2319 | -0.844 |
| CSA005266 | pmb2319 | 0.82   |
| CSA012072 | pmb2319 | 0.813  |
| CSA013107 | pmb2319 | 0.854  |
| CSA014346 | pmb2319 | 0.914  |
| CSA018764 | pmb2319 | -0.806 |
| CSA025168 | pmb2319 | -0.871 |
| CSA025169 | pmb2319 | -0.851 |
| CSA026812 | pmb2319 | 0.843  |
| CSA029366 | pmb2319 | 0.803  |
| CSA030599 | pmb2319 | 0.958  |
| CSA031091 | pmb2319 | 0.897  |
| CSA032782 | pmb2319 | 0.85   |
| CSA035088 | pmb2406 | 0.897  |
| CSA000990 | pmb2804 | 0.855  |
| CSA001069 | pmb2804 | 0.862  |
| CSA014346 | pmb2804 | 0.895  |
| CSA030599 | pmb2804 | 0.839  |
| CSA000654 | pmb3121 | -0.817 |
| CSA000990 | pmb3121 | 0.964  |
| CSA001056 | pmb3121 | -0.845 |
| CSA001069 | pmb3121 | 0.87   |
| CSA004606 | pmb3121 | -0.832 |
| CSA005242 | pmb3121 | -0.899 |
| CSA005266 | pmb3121 | 0.886  |
| CSA005321 | pmb3121 | 0.856  |
| CSA005325 | pmb3121 | 0.869  |
| CSA012072 | pmb3121 | 0.865  |
| CSA012667 | pmb3121 | -0.808 |
| CSA013107 | pmb3121 | 0.867  |
| CSA013647 | pmb3121 | -0.843 |
| CSA014346 | pmb3121 | 0.917  |
| CSA016222 | pmb3121 | -0.844 |
| CSA018764 | pmb3121 | -0.84  |
| CSA019962 | pmb3121 | -0.817 |
| CSA021792 | pmb3121 | -0.829 |
| CSA025168 | pmb3121 | -0.893 |
| CSA025169 | pmb3121 | -0.871 |
| CSA026812 | pmb3121 | 0.897  |
| CSA028920 | pmb3121 | -0.839 |
| CSA030599 | pmb3121 | 0.959  |
| CSA031091 | pmb3121 | 0.934  |
| CSA032782 | pmb3121 | 0.912  |
| CSA033891 | pmb3121 | 0.801  |
| CSA034138 | pmb3121 | -0.807 |
| CSA000990 | pmd0132 | 0.897  |
| CSA001069 | pmd0132 | 0.869  |
| CSA012072 | pmd0132 | 0.814  |
| CSA013107 | pmd0132 | 0.842  |
| CSA014346 | pmd0132 | 0.907  |
| CSA025168 | pmd0132 | -0.809 |
| CSA026812 | pmd0132 | 0.813  |
| CSA030599 | pmd0132 | 0.962  |
| CSA031091 | pmd0132 | 0.889  |
| CSA032782 | pmd0132 | 0.832  |
| CSA000990 | pmd0151 | 0.856  |
| CSA001069 | pmd0151 | 0.826  |
| CSA014346 | pmd0151 | 0.821  |
| CSA030599 | pmd0151 | 0.9    |
| CSA000990 | pma3606 | 0.92   |
| CSA001056 | pma3606 | -0.847 |

|           |         |        |
|-----------|---------|--------|
| CSA001069 | pma3606 | 0.814  |
| CSA005242 | pma3606 | -0.829 |
| CSA005266 | pma3606 | 0.845  |
| CSA013107 | pma3606 | 0.853  |
| CSA014346 | pma3606 | 0.9    |
| CSA018764 | pma3606 | -0.801 |
| CSA025168 | pma3606 | -0.883 |
| CSA025169 | pma3606 | -0.884 |
| CSA029366 | pma3606 | 0.841  |
| CSA030599 | pma3606 | 0.906  |
| CSA031091 | pma3606 | 0.847  |
| CSA032782 | pma3606 | 0.81   |
| CSA000990 | pmb0149 | 0.885  |
| CSA001052 | pmb0149 | -0.803 |
| CSA001056 | pmb0149 | -0.836 |
| CSA001069 | pmb0149 | 0.845  |
| CSA004606 | pmb0149 | -0.834 |
| CSA005242 | pmb0149 | -0.864 |
| CSA005266 | pmb0149 | 0.85   |
| CSA005325 | pmb0149 | 0.904  |
| CSA011293 | pmb0149 | 0.808  |
| CSA013647 | pmb0149 | -0.814 |
| CSA014346 | pmb0149 | 0.826  |
| CSA018764 | pmb0149 | -0.84  |
| CSA026812 | pmb0149 | 0.839  |
| CSA028920 | pmb0149 | -0.819 |
| CSA030062 | pmb0149 | 0.869  |
| CSA030599 | pmb0149 | 0.895  |
| CSA031091 | pmb0149 | 0.905  |
| CSA032782 | pmb0149 | 0.872  |
| CSA000654 | pmb0296 | -0.917 |
| CSA000990 | pmb0296 | 0.842  |
| CSA001052 | pmb0296 | -0.806 |
| CSA001056 | pmb0296 | -0.827 |
| CSA002136 | pmb0296 | -0.877 |
| CSA004606 | pmb0296 | -0.815 |
| CSA005242 | pmb0296 | -0.937 |
| CSA005266 | pmb0296 | 0.839  |
| CSA005325 | pmb0296 | 0.818  |
| CSA005774 | pmb0296 | -0.88  |
| CSA011293 | pmb0296 | 0.812  |
| CSA012038 | pmb0296 | -0.881 |
| CSA012072 | pmb0296 | 0.897  |
| CSA012667 | pmb0296 | -0.851 |
| CSA013647 | pmb0296 | -0.903 |
| CSA016222 | pmb0296 | -0.943 |
| CSA016717 | pmb0296 | -0.849 |
| CSA017230 | pmb0296 | -0.864 |
| CSA018033 | pmb0296 | 0.808  |
| CSA018764 | pmb0296 | -0.809 |
| CSA019328 | pmb0296 | 0.904  |
| CSA019962 | pmb0296 | -0.897 |
| CSA021790 | pmb0296 | -0.875 |
| CSA021792 | pmb0296 | -0.912 |
| CSA024872 | pmb0296 | -0.817 |
| CSA025168 | pmb0296 | -0.894 |
| CSA025169 | pmb0296 | -0.854 |
| CSA026812 | pmb0296 | 0.834  |
| CSA028920 | pmb0296 | -0.897 |
| CSA032782 | pmb0296 | 0.855  |
| CSA033891 | pmb0296 | 0.843  |
| CSA034138 | pmb0296 | -0.847 |
| CSA034864 | pmb0296 | 0.884  |
| CSA000654 | pmb0848 | -0.872 |
| CSA000990 | pmb0848 | 0.976  |
| CSA001052 | pmb0848 | -0.876 |
| CSA001056 | pmb0848 | -0.916 |
| CSA001069 | pmb0848 | 0.835  |
| CSA002136 | pmb0848 | -0.831 |
| CSA004606 | pmb0848 | -0.903 |
| CSA005242 | pmb0848 | -0.946 |

|           |         |        |
|-----------|---------|--------|
| CSA005266 | pmb0848 | 0.9    |
| CSA005321 | pmb0848 | 0.819  |
| CSA005325 | pmb0848 | 0.818  |
| CSA005692 | pmb0848 | -0.81  |
| CSA005774 | pmb0848 | -0.803 |
| CSA006062 | pmb0848 | -0.832 |
| CSA011293 | pmb0848 | 0.829  |
| CSA012038 | pmb0848 | -0.873 |
| CSA012072 | pmb0848 | 0.877  |
| CSA012667 | pmb0848 | -0.892 |
| CSA012669 | pmb0848 | -0.817 |
| CSA013107 | pmb0848 | 0.805  |
| CSA013647 | pmb0848 | -0.927 |
| CSA014346 | pmb0848 | 0.904  |
| CSA016222 | pmb0848 | -0.893 |
| CSA016717 | pmb0848 | -0.887 |
| CSA017230 | pmb0848 | -0.813 |
| CSA018764 | pmb0848 | -0.899 |
| CSA019962 | pmb0848 | -0.863 |
| CSA021790 | pmb0848 | -0.86  |
| CSA021792 | pmb0848 | -0.909 |
| CSA025168 | pmb0848 | -0.927 |
| CSA025169 | pmb0848 | -0.903 |
| CSA026812 | pmb0848 | 0.9    |
| CSA028920 | pmb0848 | -0.918 |
| CSA030599 | pmb0848 | 0.883  |
| CSA031091 | pmb0848 | 0.903  |
| CSA032782 | pmb0848 | 0.911  |
| CSA033891 | pmb0848 | 0.82   |
| CSA034138 | pmb0848 | -0.851 |
| CSA034864 | pmb0848 | 0.854  |
| CSA000654 | pmb0859 | -0.865 |
| CSA000990 | pmb0859 | 0.941  |
| CSA001056 | pmb0859 | -0.836 |
| CSA001069 | pmb0859 | 0.901  |
| CSA002136 | pmb0859 | -0.845 |
| CSA004606 | pmb0859 | -0.814 |
| CSA005242 | pmb0859 | -0.931 |
| CSA005266 | pmb0859 | 0.839  |
| CSA005321 | pmb0859 | 0.834  |
| CSA005325 | pmb0859 | 0.856  |
| CSA005774 | pmb0859 | -0.828 |
| CSA012038 | pmb0859 | -0.804 |
| CSA012072 | pmb0859 | 0.819  |
| CSA012667 | pmb0859 | -0.82  |
| CSA013647 | pmb0859 | -0.842 |
| CSA014346 | pmb0859 | 0.864  |
| CSA016222 | pmb0859 | -0.888 |
| CSA017230 | pmb0859 | -0.84  |
| CSA018764 | pmb0859 | -0.818 |
| CSA019328 | pmb0859 | 0.853  |
| CSA019962 | pmb0859 | -0.848 |
| CSA021792 | pmb0859 | -0.84  |
| CSA025168 | pmb0859 | -0.896 |
| CSA025169 | pmb0859 | -0.861 |
| CSA026812 | pmb0859 | 0.905  |
| CSA028920 | pmb0859 | -0.849 |
| CSA030062 | pmb0859 | 0.809  |
| CSA030599 | pmb0859 | 0.853  |
| CSA031091 | pmb0859 | 0.849  |
| CSA032782 | pmb0859 | 0.891  |
| CSA034138 | pmb0859 | -0.825 |
| CSA000990 | pmb0863 | 0.926  |
| CSA001056 | pmb0863 | -0.831 |
| CSA001069 | pmb0863 | 0.835  |
| CSA005242 | pmb0863 | -0.871 |
| CSA012667 | pmb0863 | -0.813 |
| CSA013647 | pmb0863 | -0.806 |
| CSA014346 | pmb0863 | 0.88   |
| CSA016222 | pmb0863 | -0.813 |
| CSA021792 | pmb0863 | -0.807 |



|           |         |        |
|-----------|---------|--------|
| CSA025168 | pmb0863 | -0.92  |
| CSA025169 | pmb0863 | -0.89  |
| CSA026812 | pmb0863 | 0.839  |
| CSA028920 | pmb0863 | -0.809 |
| CSA030599 | pmb0863 | 0.863  |
| CSA031091 | pmb0863 | 0.82   |
| CSA032782 | pmb0863 | 0.811  |
| CSA019962 | pmb0865 | -0.831 |
| CSA000654 | pmb0873 | -0.889 |
| CSA000990 | pmb0873 | 0.921  |
| CSA001052 | pmb0873 | -0.811 |
| CSA001056 | pmb0873 | -0.844 |
| CSA001069 | pmb0873 | 0.856  |
| CSA002136 | pmb0873 | -0.851 |
| CSA004606 | pmb0873 | -0.841 |
| CSA005242 | pmb0873 | -0.943 |
| CSA005266 | pmb0873 | 0.823  |
| CSA005321 | pmb0873 | 0.821  |
| CSA005325 | pmb0873 | 0.835  |
| CSA005774 | pmb0873 | -0.842 |
| CSA011293 | pmb0873 | 0.81   |
| CSA012038 | pmb0873 | -0.864 |
| CSA012072 | pmb0873 | 0.885  |
| CSA012667 | pmb0873 | -0.858 |
| CSA013647 | pmb0873 | -0.874 |
| CSA014346 | pmb0873 | 0.83   |
| CSA016222 | pmb0873 | -0.913 |
| CSA016717 | pmb0873 | -0.83  |
| CSA017230 | pmb0873 | -0.846 |
| CSA018764 | pmb0873 | -0.833 |
| CSA019328 | pmb0873 | 0.867  |
| CSA019962 | pmb0873 | -0.894 |
| CSA021790 | pmb0873 | -0.83  |
| CSA021792 | pmb0873 | -0.888 |
| CSA025168 | pmb0873 | -0.924 |
| CSA025169 | pmb0873 | -0.87  |
| CSA026812 | pmb0873 | 0.901  |
| CSA028920 | pmb0873 | -0.887 |
| CSA030599 | pmb0873 | 0.838  |
| CSA031091 | pmb0873 | 0.866  |
| CSA032782 | pmb0873 | 0.88   |
| CSA034138 | pmb0873 | -0.833 |
| CSA034864 | pmb0873 | 0.857  |
| CSA000990 | pmb0885 | 0.909  |
| CSA001052 | pmb0885 | -0.803 |
| CSA001056 | pmb0885 | -0.854 |
| CSA004606 | pmb0885 | -0.829 |
| CSA005266 | pmb0885 | 0.825  |
| CSA013107 | pmb0885 | 0.811  |
| CSA014346 | pmb0885 | 0.822  |
| CSA018764 | pmb0885 | -0.846 |
| CSA025168 | pmb0885 | -0.815 |
| CSA025169 | pmb0885 | -0.844 |
| CSA030599 | pmb0885 | 0.885  |
| CSA031091 | pmb0885 | 0.865  |
| CSA000990 | pmb1656 | -0.826 |
| CSA001069 | pmb1656 | -0.817 |
| CSA005242 | pmb1656 | 0.802  |
| CSA014346 | pmb1656 | -0.851 |
| CSA025168 | pmb1656 | 0.827  |
| CSA025169 | pmb1656 | 0.866  |
| CSA034138 | pmb1656 | 0.815  |
| CSA000654 | pmb2363 | -0.942 |
| CSA000990 | pmb2363 | 0.882  |
| CSA001052 | pmb2363 | -0.818 |
| CSA001056 | pmb2363 | -0.855 |
| CSA002136 | pmb2363 | -0.906 |
| CSA004606 | pmb2363 | -0.831 |
| CSA005242 | pmb2363 | -0.961 |
| CSA005266 | pmb2363 | 0.879  |
| CSA005321 | pmb2363 | 0.843  |

|           |         |        |
|-----------|---------|--------|
| CSA005325 | pmb2363 | 0.86   |
| CSA005774 | pmb2363 | -0.906 |
| CSA011293 | pmb2363 | 0.817  |
| CSA012038 | pmb2363 | -0.88  |
| CSA012072 | pmb2363 | 0.898  |
| CSA012667 | pmb2363 | -0.871 |
| CSA013647 | pmb2363 | -0.92  |
| CSA014346 | pmb2363 | 0.835  |
| CSA016222 | pmb2363 | -0.964 |
| CSA016717 | pmb2363 | -0.867 |
| CSA017230 | pmb2363 | -0.892 |
| CSA018033 | pmb2363 | 0.8    |
| CSA018764 | pmb2363 | -0.827 |
| CSA019328 | pmb2363 | 0.902  |
| CSA019962 | pmb2363 | -0.9   |
| CSA021790 | pmb2363 | -0.899 |
| CSA021792 | pmb2363 | -0.933 |
| CSA024081 | pmb2363 | -0.811 |
| CSA024872 | pmb2363 | -0.842 |
| CSA025168 | pmb2363 | -0.92  |
| CSA025169 | pmb2363 | -0.885 |
| CSA026812 | pmb2363 | 0.856  |
| CSA028920 | pmb2363 | -0.914 |
| CSA031091 | pmb2363 | 0.815  |
| CSA032782 | pmb2363 | 0.887  |
| CSA033891 | pmb2363 | 0.851  |
| CSA034138 | pmb2363 | -0.881 |
| CSA034864 | pmb2363 | 0.886  |
| CSA000654 | pmb2388 | -0.809 |
| CSA000990 | pmb2388 | 0.867  |
| CSA001069 | pmb2388 | 0.822  |
| CSA002136 | pmb2388 | -0.814 |
| CSA005242 | pmb2388 | -0.863 |
| CSA014346 | pmb2388 | 0.822  |
| CSA016222 | pmb2388 | -0.841 |
| CSA019328 | pmb2388 | 0.87   |
| CSA025168 | pmb2388 | -0.863 |
| CSA025169 | pmb2388 | -0.814 |
| CSA026812 | pmb2388 | 0.848  |
| CSA032782 | pmb2388 | 0.811  |
| CSA000654 | pmb3132 | -0.902 |
| CSA000990 | pmb3132 | 0.823  |
| CSA002136 | pmb3132 | -0.874 |
| CSA005242 | pmb3132 | -0.861 |
| CSA005321 | pmb3132 | 0.847  |
| CSA005774 | pmb3132 | -0.874 |
| CSA012072 | pmb3132 | 0.913  |
| CSA013647 | pmb3132 | -0.817 |
| CSA016222 | pmb3132 | -0.906 |
| CSA017230 | pmb3132 | -0.855 |
| CSA019328 | pmb3132 | 0.84   |
| CSA019962 | pmb3132 | -0.897 |
| CSA021790 | pmb3132 | -0.8   |
| CSA021792 | pmb3132 | -0.836 |
| CSA026812 | pmb3132 | 0.837  |
| CSA028920 | pmb3132 | -0.802 |
| CSA032782 | pmb3132 | 0.855  |
| CSA033891 | pmb3132 | 0.809  |
| CSA034864 | pmb3132 | 0.853  |
| CSA000654 | pmc0960 | -0.872 |
| CSA000990 | pmc0960 | 0.859  |
| CSA001069 | pmc0960 | 0.859  |
| CSA002136 | pmc0960 | -0.845 |
| CSA005242 | pmc0960 | -0.913 |
| CSA005325 | pmc0960 | 0.847  |
| CSA005774 | pmc0960 | -0.844 |
| CSA012038 | pmc0960 | -0.824 |
| CSA012072 | pmc0960 | 0.834  |
| CSA013647 | pmc0960 | -0.826 |
| CSA016222 | pmc0960 | -0.896 |
| CSA017230 | pmc0960 | -0.845 |

|           |         |        |
|-----------|---------|--------|
| CSA019328 | pmc0960 | 0.901  |
| CSA019962 | pmc0960 | -0.889 |
| CSA021792 | pmc0960 | -0.824 |
| CSA025168 | pmc0960 | -0.836 |
| CSA026812 | pmc0960 | 0.886  |
| CSA028920 | pmc0960 | -0.838 |
| CSA030062 | pmc0960 | 0.826  |
| CSA031091 | pmc0960 | 0.802  |
| CSA032782 | pmc0960 | 0.865  |
| CSA034864 | pmc0960 | 0.81   |
| CSA005242 | pmb0161 | -0.809 |
| CSA012072 | pmb0161 | 0.84   |
| CSA016222 | pmb0161 | -0.817 |
| CSA021792 | pmb0161 | -0.837 |
| CSA025168 | pmb0161 | -0.836 |
| CSA033891 | pmb0161 | 0.806  |
| CSA034864 | pmb0161 | 0.838  |
| CSA000654 | pmb0163 | -0.813 |
| CSA005242 | pmb0163 | -0.832 |
| CSA012038 | pmb0163 | -0.821 |
| CSA012072 | pmb0163 | 0.836  |
| CSA013647 | pmb0163 | -0.819 |
| CSA016222 | pmb0163 | -0.838 |
| CSA021790 | pmb0163 | -0.817 |
| CSA021792 | pmb0163 | -0.862 |
| CSA025168 | pmb0163 | -0.847 |
| CSA028920 | pmb0163 | -0.824 |
| CSA033891 | pmb0163 | 0.812  |
| CSA034864 | pmb0163 | 0.857  |
