# Supplementary material for: Exogenous abscisic acid induces the lipid and flavonoid metabolism of tea plants under drought stress
Source: PubMed Central journal article supplement (PMC7378251; doi:10.1038/s41598-020-69080-1), 2020-07-23
Supplement: 41598_2020_69080_MOESM9_ESM.pdf [file 41598_2020_69080_MOESM9_ESM.pdf]

# Exogenous abscisic acid induces the lipid and flavonoid metabolism of tea plants under drought stress

Zhongshuai Gai<sup>12#</sup>, Yu Wang<sup>1#</sup>, Yiqian Ding<sup>1</sup>, Wenjun Qian<sup>1</sup>, Chen Qiu<sup>1</sup>, Hui Xie<sup>1</sup>, Litao Sun<sup>1</sup>, Zhongwu Jiang<sup>2</sup>, Qingping Ma<sup>3</sup>, Linjun Wang<sup>4</sup>, Zhaotang Ding<sup>1\*</sup>

<sup>1</sup>Tea Research Institute, Qingdao Agricultural University, Qingdao 266109, China

<sup>2</sup>College of Life Science, Yantai University, Yantai, Shandong, 264005, China

<sup>3</sup>College of agriculture, Liaocheng University, Liaocheng, Shandong, 252059, China

<sup>4</sup>Fruit tea station of weihai agricultural and rural affairs service center, Weihai, Shandong, 264200, China

# These authors contributed equally to this study.

\*CORRESPONDENCE: Dr Zhaotang Ding E-mails: dztea@163.com

**Table S6 Primer used for qRT-PCR**

| Gene ID   | Forward primer           | Reverse primer           |
|-----------|--------------------------|--------------------------|
| CSA030599 | TGCGGGCTATGATTGTGACTAC   | ACATCTTCGCCTGGATTAGGG    |
| CSA011597 | TCTGCTGATAGCTCCACAGGG    | GGACAAGGCTTTTGAAAACACTTC |
| CSA032782 | TTCTTCTCCACCAAACCACG     | CAGCAATCATCAATGCCGACT    |
| CSA000990 | GCTGCAATCCCTAACCAAAGTATC | AGCTGACCAAGGCTCCCAAG     |
| CSA016635 | TTTACAGGGTCCACGGAAGTAGG  | ACCGCCCAAAGAGCAAGAT      |
| CSA026735 | CTTGGAGCAAGTTGTCGAGTTTT  | AGGCTGTTGGCTAAGCAGGA     |
| CSA003949 | AAACCTATCCCTGCCTCGTCG    | CACAAGTCTCCCACATCGTACTCA |
| CSA000931 | ATCACCCCGAGCCCTAACTG     | TTGAAGAAAGCGAAGAAGCACTAA |
| CSA033689 | CCTTGGGTCTGGTGGGACTAT    | CAACTTGAGCATCTTGCTCTTCTT |
| CSA020560 | GATTGGTCGGGATGGGAGTG     | CCGACAAATCTATGCGAGGCT    |
| GADPH     | TTGGCATCGTTGAGGGTCT      | CAGTGGGAACACGGAAAGC      |
